# Supplementary material for: Ethylene-Related Gene Expression Networks in Wood Formation
Source: Front Plant Sci. 2018 Mar 14;9:272. doi: 10.3389/fpls.2018.00272 (PMC5861219; doi:10.3389/fpls.2018.00272)
Supplement: Supplementary Table S1 — Gene identities and abbreviations used for phylogenetic analysis of gene families in the ethylene pathway. [file Table1.xlsx]

## Sheet: Sheet1
		Supplementary Table S1. Gene identities and abbreviations used for phylogenetic analysis of gene families in the ethylene pathway. At= Arabidopsis thaliana; Pt= Populus trichocarpa; Pa=Picea abies
		Group	Abbreviation	Gene ID
		SAMS	AtSAMS1	AT1G02500
			AtSAMS2	AT4G01850
			AtSAMS3	AT3G17390
			AtSAMS4	AT2G36880	also known as AtMAT3
			PtSAMS1	Potri.008G099300
			PtSAMS2	Potri.013G004100
			PtSAMS3	Potri.010G153500
			PtSAMS4	Potri.014G114700
			PtSAMS5	Potri.002G189000
			PtSAMS6	Potri.006G123200
			PtSAMS7	Potri.002G189200
			PaSAMS1	MA_58651g0010
			PaSAMS2	MA_141759g0010
		ACS	AtACS1	AT3G61510
			AtACS2	AT1G01480
			AtACS4	AT2G22810
			AtACS5	AT5G65800
			AtACS6	AT4G11280
			AtACS7	AT4G26200
			AtACS8	AT4G37770
			AtACS9	AT3G49700
			AtACS10	AT1G62960
			AtACS11	AT4G08040
			AtACS12	AT5G51690
			PtACS1	Potri.001G099400
			PtACS2	Potri.002G163700
			PtACS3	Potri.007G007800
			PtACS4	Potri.014G012600
			PtACS5	Potri.018G067000
			PtACS6	Potri.006G149600
			PtACS7	Potri.003G132300
			PtACS8	Potri.002G113900
			PtACS10	Potri.003G117700
			PtACS12	Potri.015G132100
			PaACS1	MA_17005g0010
			PaACS2	MA_121240g0010
			PaACS3	MA_162831g0010
			PaACS4	MA_117710g0010
			PaACS5	MA_10375359g0010
			PaACS6	MA_103524g0010
			PaACS7	MA_66897g0010
			PaACS8	MA_14219g0010
		ACS stability	AtEOL1	AT4G02680
			AtEOL2	AT5G58550
			AtETO1	AT3G51770
			AtRCN1	AT1G25490
			PtRCN1A	Potri.010G127500
			PtRCN1B	Potri.008G118500
			PtRCN1C	Potri.012G062700
			PtEOL1A	Potri.002G048300
			PtEOL1B	Potri.005G214400
			PtETO1A	Potri.001G280100
			PtETO1B	Potri.006G103400
			PtETO1C	Potri.009G075300
			PtETO1D	Potri.016G123800
			PtXBAT32A	Potri.006G176600
			PtXBAT32B	Potri.018G098400
		ACC transporter	AtLHT1	AT5G40780
			AtLHT2	AT1G24400
			AtLHT3	AT1G61270
			AtLHT4	AT1G47670
			AtLHT5	AT1G67640
			AtLHT6	AT3G01760
			AtLHT7	AT4G35180
			AtLHT8	AT1G71680
			AtLHT9	AT1G48640
			AtLHT10	AT1G25530
			Pt LHT1	Potri.015G091600
			Pt LHT1.2	Potri.001G335300
			Pt LHT2	Potri.010G055800
			Pt LHT3	Potri.010G128300
			Pt LHT4	Potri.014G036500
			Pt LHT5	Potri.008G179000
			Pt LHT8	Potri.001G335200
			Pt LHT6	Potri.008G118000
			Pt LHT7	Potri.004G181100
		ACO	AtACO1	At2g19590
			AtACO2	At1g62380
			AtACO3	At1g12010
			AtACO4	At1g05010
			AtACO5	At1g77330
			PtACO1	Potri.002G078600
			PtACO2	Potri.002G224100
			PtACO3	Potri.014G159000
			PtACO4	Potri.005G182700
			PtACO5	Potri.006G151600
			PtACO6	Potri.004G003000
			PtACO7	Potri.011G020900
			PaACO1	MA_2297g0010	comp42865_c0_seq1
			PaACO2	MA_54476g0010
			PaACO3	MA_9554510g0010
			PaACO4	MA_10431299g0010
		Receptor regulator	PtRAN1A	Potri.001G158900
			PtRAN1B	Potri.003G075700
			PtRTE1A	Potri.006G229900
			PtRTE1B	Potri.018G053900
			PtRTH1	Potri.007G017900
		ETR	AtETR1	AT1G66340	also known as AtEIN1
			AtETR2	AT3G23150
			AtERS1	AT2G40940
			AtEIN4	AT3G04580
			PtETR1	Potri.002G201500
			PtETR2	Potri.010G074300
			PtETR3	Potri.001G204200
			PtETR4	Potri.003G032300
			PtETR5	Potri.008G164400
			PtETR6	Potri.013G044100
			PtETR7	Potri.019G014300
			PaETR1	MA_67531g0010
			PaETR2	MA_10048g0010
			PaETR3	MA_40935g0030
		CTR	AtCTR1	AT5G03730
			PtCTR1A	Potri.010G234700
			PtCTR1B	Potri.008G025800
			PtCTR1C	Potri.006G115800
			PtCTR1D	Potri.016G095700
			PtCTR1E	Potri.016G095800
			PaCTR1	MA_35694g0010	comp76577_c0_seq1
		EIN2	AtEIN2	AT5G03280
			PtEIN2A	Potri.006G127100
			PtEIN2B	Potri.016G090800
			PaEIN2	MA_17425g0010
		EIN3	AtEIL1	AT2G27050
			AtEIL2	AT5G2112
			AtEIL3	AT1G73730
			AtEIN3	AT3G20770
			AtEIN3B	AT5G65100
			AtEIN3C	AT5G10120
			PtEIN3A	Potri.009G159200
			PtEIN3B	Potri.004G197400
			PtEIN3C	Potri.010G247500
			PtEIN3D	Potri.008G011300
			PtEIN3E	Potri.003G210500
			PtEIN3F	Potri.001G015900
			PtEIN3G	Potri.001G016000
			PaEIN3A	MA_10086718g0010
			PaEIN3B	MA_52817g0010
			PaEIN3C	MA_132897g0010
			PaEIN3D	MA_53004g0010
		EBF	AtEBF1	AT2G25490
			AtEBF2	AT5G25350
			PtEBF3A	Potri.006G254100
			PtEBF3B	Potri.018G027700
			PtEBF4A	Potri.006G068500
			PtEBF4B	Potri.018G130800
			PaEBF1	MA_10436543g0020	comp92252_c0_seq1
			PaEBF2	MA_64990g0010	comp83866_c0_seq1
		ERF		At1g36060
				At1g22190
				At1g78080
				At5g65130
				At2g22200
				At4g39780
				At1g64380
				At4g13620
				At2g20880
				At4g28140
				At1g21910
				At1g77640
				At1g44830
				At1g71520
				At1g22810
				At4g06746
				At1g46768
				At4g36900
				At2g23340
				At5g67190
				At3g50260
				At4g31060
				At1g19210
				At1g74930
				At5g21960
				At4g16750
				At2g35700
				At3g16280
				At2g25820
				At4g32800
				At3g60490
				At2g44940
				At1g77200
				At5g25810
				At5g11590
				At1g01250
				At1g71450
				At1g33760
				At2g36450
				At1g63040
				At5g52020
				At1g12630
				At5g51990
				At4g25490
				At4g25470
				At4g25480
				At1g63030
				At1g12610
				At5g05410
				At3g11020
				At2g38340
				At2g40350
				At2g40340
				At5g18450
				At1g75490
				At3g57600
				At2g40220
				At5g11190
				At5g25390
				At1g15360
				At5g25190
				At5g19790
				At4g23750
				At4g11140
				At1g71130
				At1g22985
				At2g46310
				At3g61630
				At4g27950
				At5g53290
				At3g25890
				At1g68550
				At1g25470
				At1g49120
				At3g16770
				At2g47520
				At1g72360
				At1g53910
				At1g53910
				At5g44210
				At1g28370
				At3g15210
				At1g53170
				At1g03800
				At1g50640
				At3g20310
				At3g20310
				At1g80580
				At1g12980
				At1g24590
				At1g12890
				At1g28160
				At5g18560
				At5g13910
				At3g23240
				At1g06160
				At2g31230
				At4g18450
				At5g43410
				At1g04370
				At3g23220
				At3g23230
				At4g17500
				At5g47220
				At2g44840
				At5g61590
				At5g07580
				At5g47230
				At4g17490
				At5g51190
				At5g61600
				At5g61890
				At5g07310
				At5g13330
				At2g33710
				At5g64750
				At1g43160
				At5g50080
			ERF1	Potri.001G079600
			ERF2	Potri.003G151000
			ERF3	Potri.003G080600
			ERF4	Potri.001G154200
			ERF5	Potri.003G150800
			ERF6	Potri.001G079800
			ERF7	Potri.014G047000
			ERF8	Potri.014G046600
			ERF9	Potri.014G046700
			ERF10	Potri.014G046800
			ERF11	Potri.014G046900
			ERF12	Potri.001G079900
			ERF13	Potri.003G150700
			ERF14	Potri.001G154100
			ERF15	Potri.008G166100
			ERF16	Potri.003G081200
			ERF17	Potri.002G039200
			ERF18	Potri.005G223100
			ERF19	Potri.010G072400
			ERF20	Potri.002G039300
			ERF21	Potri.010G072600
			ERF22	Potri.004G051800
			ERF23	Potri.011G061800
			ERF24	Potri.004G051700
			ERF25	Potri.011G061700
			ERF26	Potri.008G166000
			ERF27	Potri.005G223300
			ERF28	Potri.002G039000
			ERF29	Potri.T050600
			ERF30	Potri.013G045200
			ERF31	Potri.002G039100
			ERF32	Potri.005G223200
			ERF33	Potri.010G072300
			ERF34	Potri.010G006800
			ERF35	Potri.008G210900
			ERF36	Potri.002G201600
			ERF37	Potri.014G126100
			ERF38	Potri.001G163700
			ERF39	Potri.003G071700
			ERF40	Potri.001G356100
			ERF41	Potri.002G043300
			ERF42	Potri.005G219600
			ERF43	Potri.004G047500
			ERF44	Potri.011G056900
			ERF45	Potri.007G138100
			ERF46	Potri.017G013700
			ERF47	Potri.011G057000
			ERF48	Potri.004G047600
			ERF49	Potri.011G115600
			ERF50	Potri.001G397200
			ERF51	Potri.017G053700
			ERF52	Potri.001G313500
			ERF53	Potri.014G076700
			ERF54	Potri.017G087800
			ERF55	Potri.008G091300
			ERF56	Potri.013G056700
			ERF57	Potri.019G036100
			ERF58	Potri.001G004700
			ERF59	Potri.003G220200
			ERF60	Potri.010G046600
			ERF61	Potri.008G186300
			ERF62	Potri.019G088000
			ERF63	Potri.008G215600
			ERF64	Potri.003G161000
			ERF65	Potri.001G069300
			ERF66	Potri.003G077700
			ERF67	Potri.001G157100
			ERF68	Potri.004G141200
			ERF69	Potri.009G101900
			ERF70	Potri.001G067600
			ERF71	Potri.003G162500
			ERF72	Potri.012G108500
			ERF73	Potri.007G076800
			ERF74	Potri.005G087200
			ERF75	Potri.002G065600
			ERF76	Potri.005G195000
			ERF77	Potri.007G043400
			ERF78	Potri.015G054500
			ERF79	Potri.008G120100
			ERF80	Potri.010G125600
			ERF81	Potri.019G131300
			ERF82	Potri.013G158500
			ERF83	Potri.002G167400
			ERF84	Potri.014G094500
			ERF85	Potri.015G023200
			ERF86	Potri.012G032900
			ERF87	Potri.001G094800
			ERF88	Potri.003G136300
			ERF89	Potri.002G153500
			ERF90	Potri.010G163900
			ERF91	Potri.001G453100
			ERF92	Potri.011G148900
			ERF93	Potri.008G166200
			ERF94	Potri.008G071100
			ERF95	Potri.010G186400
			ERF96	Potri.006G104200
			ERF97	Potri.016G126100
			ERF98	Potri.006G054500
			ERF99	Potri.016G053200
			ERF100	Potri.010G183700
			ERF101	Potri.008G073600
			ERF102	Potri.005G233300
			ERF103	Potri.002G029400
			ERF104	Potri.001G315300
			ERF105	Potri.017G055400
			ERF106	Potri.003G139300
			ERF107	Potri.001G092400
			ERF108	Potri.019G102200
			ERF109	Potri.013G135600
			ERF110	Potri.005G077300
			ERF111	Potri.002G094200
			ERF112	Potri.007G090600
			ERF113	Potri.005G168700
			ERF114	Potri.003G179900
			ERF115	Potri.001G048200
			ERF116	Potri.018G021900
			ERF117	Potri.006G261200
			ERF118	Potri.018G028000
			ERF119	Potri.006G253800
			ERF120	Potri.003G033000
			ERF121	Potri.006G069400
			ERF122	Potri.018G131400
			ERF123	Potri.006G080300
			ERF124	Potri.007G046500
			ERF125	Potri.005G140900
			ERF126	Potri.002G124000
			ERF127	Potri.014G025200
			ERF128	Potri.018G038100
			ERF129	Potri.006G138900
			ERF130	Potri.005G176000
			ERF131	Potri.002G085600
			ERF132	Potri.019G073300
			ERF133	Potri.013G100300
			ERF134	Potri.018G047300
			ERF135	Potri.006G218200
			ERF136	Potri.006G138700
			ERF137	Potri.006G138800
			ERF138	Potri.001G181500
			ERF139	Potri.013G101100
			ERF140	Potri.019G075500
			ERF141	Potri.003G054400
			ERF142	Potri.013G101200
			ERF143	Potri.019G075600
			ERF144	Potri.019G067400
			ERF145	Potri.014G099900
			ERF146	Potri.002G172200
			ERF147	Potri.002G172300
			ERF148	Potri.006G021000
			ERF149	Potri.016G018600
			ERF150	Potri.015G136300
			ERF151	Potri.012G134000
			ERF152	Potri.003G121200
			ERF153	Potri.001G110500
			ERF154	Potri.009G147700
			ERF155	Potri.004G187000
			ERF156	Potri.001G110800
			ERF157	Potri.001G110700
			ERF158	Potri.012G134100
			ERF159	Potri.015G136400
			ERF160	Potri.002G141200
			ERF161	Potri.014G055700
			ERF162	Potri.003G079300
			ERF163	Potri.001G155700
			ERF164	Potri.003G050700
			ERF165	Potri.001G187500
			ERF166	Potri.018G085700
			ERF167	Potri.006G156600
			ERF168	Potri.006G238600
			ERF169	Potri.018G043900
			ERF170	Potri.006G163400
