# Supplementary material for: Ethylene-Related Gene Expression Networks in Wood Formation
Source: Front Plant Sci. 2018 Mar 14;9:272. doi: 10.3389/fpls.2018.00272 (PMC5861219; doi:10.3389/fpls.2018.00272)
Supplement: Supplementary Table S6 — Structure and assembly of ERF co-expression networks. [file Table6.xlsx]

## Sheet: Sheet1
Supplementary Table S6. Structure and assembly of ERF co-expression networks. Data was extracted from aspwood.popgenie.org/. Identified genes (P.trichocarpa) in the coexpressed gene module were compared to Supplementary Table S3, S4, and S7. GO term enrichment analysis was performed using the Arabidopsis homologs (Sheet8).

## Sheet: ERF87
Gene id	Description	Synonyms	Attr	ortholog	at desc	deg	btw_rank	Hubs(=top20 %)	Ethylene-responsive Gene	Co-expressed gene of ethyl-reg.TF (Table S8)
Potri.001G094800	ERF87	POPTR_0001s10300, AT4G23750,CRF2,TMO3	!v3,!TF,!b	AT4G23750	cytokinin response factor 2	95	252	Yes
Potri.001G401400		POPTR_0001s41180, AT1G23220,	!v3,!b	AT1G23220	Dynein light chain type 1 family protein	102	4210
Potri.002G005300		, AT1G06330,	!v3,!b	AT1G06330	Heavy metal transport/detoxification superfamily protein	62	803	Yes
Potri.002G018300		POPTR_0002s01990, CADL2, eugene3.00020162, AT4G39330,ATCAD9,CAD9	!v3,!b	AT4G39330	cinnamyl alcohol dehydrogenase 9	169	954	Yes
Potri.002G121800		POPTR_0002s12330,NULL,	!v3,!b	NULL	NULL	45	9689
Potri.004G057700		POPTR_0004s05640, estExt_Genewise1_v1.C_LG_IV2709, AT1G09850,XBCP3	!v3,!b	AT1G09850	xylem bark cysteine peptidase 3	152	6377
Potri.004G149500	similar to DC1 domain-containing protein; [ co-ortholog (1of2) of At2g16050, ]	POPTR_0004s15670, grail3.0045000601, AT2G16050,	!v3,!b	AT2G16050	Cysteine/Histidine-rich C1 domain family protein	213	4816
Potri.005G122700		POPTR_0005s12440, AT3G50870,GATA18,HAN,MNP	!v3,!TF,!b	AT3G50870	GATA type zinc finger transcription factor family protein	160	7970
Potri.005G256300		POPTR_0005s27760, AT4G10465,	!v3,!b	AT4G10465	Heavy metal transport/detoxification superfamily protein	88	9428
Potri.006G191100		POPTR_0006s20550, AT5G06790,	!v3,!miR,!b	AT5G06790	unknown	122	4046
Potri.007G024500	similar to MONOPOLE; [ ortholog of At2g18380,At3g50870,At4g36620,]	POPTR_0007s12930, Pt-MNP.1, gw1.VII.3550.1, AT3G50870,GATA18,HAN,MNP	!v3,!TF,!b	AT3G50870	GATA type zinc finger transcription factor family protein	155	1356	Yes
Potri.007G024700		POPTR_0007s12910, eugene3.00071098, AT5G47530,	!v3,!b	AT5G47530	Auxin-responsive family protein	177	7027
Potri.008G013900		POPTR_0008s01450, fgenesh4_pg.C_LG_VIII000115, AT5G04890,RTM2	!v3,!b	AT5G04890	HSP20-like chaperones superfamily protein	197	4078
Potri.009G117100		POPTR_0009s11980, AT2G18360,	!v3,!b	AT2G18360	alpha/beta-Hydrolases superfamily protein	212	2950
Potri.010G050700		, AT1G67790,	!v3,!b	AT1G67790	unknown	144	3329
Potri.010G173500		POPTR_0010s18070, AT1G79480,	!v3,!b	AT1G79480	Carbohydrate-binding X8 domain superfamily protein	188	4224
Potri.011G140400		POPTR_0878s00210, AT1G78380,ATGSTU19,GST8,GSTU19	!v3,!miR,!b	AT1G78380	glutathione S-transferase TAU 19	155	4304
Potri.012G118600		POPTR_0012s11910, fgenesh4_pg.C_scaffold_200000019, AT3G06880,	!v3,!b	AT3G06880	Transducin/WD40 repeat-like superfamily protein	69	2929
Potri.015G098200		POPTR_0015s11010, AT3G27030,	!v3,!b	AT3G27030	unknown	192	8028
Potri.018G005300		POPTR_0018s03770, AT5G14750,ATMYB66,MYB66,WER,WER1	!v3,!TF,!b	AT5G14750	myb domain protein 66	197	3482
Potri.019G088200		POPTR_0019s11800, gw1.XIX.2223.1, AT1G17860,	!v3,!miR,!b	AT1G17860	Kunitz family trypsin and protease inhibitor protein	205	6145

## Sheet: ERF118-49
Gene id	Description	Synonyms	Attr	ortholog	at desc	deg	btw_rank	Hubs(=top20 %)	Ethylene-responsive Gene	Co-expressed gene of ethyl-reg.TF (Table S8)
Potri.001G023600		POPTR_0001s06100, AT3G13650,	!v3,!h	AT3G13650	Disease resistance-responsive (dirigent-like protein) family protein	71	4763
Potri.001G111600	similar to hypothetical protein. [ORG:Cicer arietinum]; [ co-ortholog (1of3) of At4g22980, CAG14987, At5g51920, ]	POPTR_0001s08610, gw1.I.9187.1, AT5G51920,	!v3,!e	AT5G51920	Pyridoxal phosphate (PLP)-dependent transferases superfamily protein	117	642	Yes
Potri.001G272300		POPTR_0001s27920, AT2G26770,	!v3,!h	AT2G26770	plectin-related	93	2035	Yes
Potri.001G332400		,NULL,	!v3,!e	NULL	NULL	70	678	Yes
Potri.002G013400	similar to alcohol dehydrogenase; putative; similar to alcohol dehydrogenase ADH GI:7705214 from (Lycopersicon esculentum); [ ortholog of At5g42250,]	POPTR_0002s01480, estExt_fgenesh4_pg.C_LG_II0121, AT5G42250,	!v3,!miR,!e	AT5G42250	Zinc-binding alcohol dehydrogenase family protein	64	968	Yes
Potri.002G057800	similar to MANGLED; similar to VACUOLELESS 1; [ co-ortholog (2of4) of At2g38020, ]	POPTR_0002s05890, Pt-VCL1.3, fgenesh4_pg.C_LG_II000545, AT2G38020,EMB258,MAN,VCL1	!v3,!miR,!h	AT2G38020	vacuoleless1 (VCL1)	67	1244	Yes
Potri.002G098100		POPTR_0002s09830, AT1G22330,	!v3,!e	AT1G22330	RNA-binding (RRM/RBD/RNP motifs) family protein	87	1134	Yes
Potri.002G106800	similar to leucine-rich repeat transmembrane protein kinase; putative; similar to A. thaliana receptor-like protein kinase (gb|RLK5_ARATH|ESTs). gb|ATTS0475 ; similar to gb|ATTS4362 come from this gen	POPTR_0002s10700, gw1.II.1507.1, AT1G09970,LRR XI-23,RLK7	!v3,!d	AT1G09970	Leucine-rich receptor-like protein kinase family protein	48	6349
Potri.002G139700		POPTR_0002s14050, AT2G44710,	!v3,!d	AT2G44710	RNA-binding (RRM/RBD/RNP motifs) family protein	67	6691
Potri.002G202500		POPTR_0002s20370, POPTR_0002s20360, AT5G53370,	!v3,!e	AT5G53370	pectin methylesterase PCR fragment F	92	3109
Potri.003G015200	similar to ferredoxin I. [ORG:Arachis hypogaea]; [ co-ortholog (2of4) of 1503271A, P09911, AAA33665, ]	POPTR_0003s01090, Pt-PETF.4, grail3.0067001301, AT1G60950,ATFD2,FED A	!v3,!e	AT1G60950	2Fe-2S ferredoxin-like superfamily protein	4	10576
Potri.003G022900	similar to beta-glucosidase. [ORG:Glycine max]; [ co-ortholog (1of3) of At5g09700, At5g09730, AAD09291, At5g64570, ]	POPTR_0003s01730, fgenesh4_pm.C_LG_III000026, Pt-XYL4.3, AT5G64570,ATBXL4,XYL4	!v3,!e	AT5G64570	beta-D-xylosidase 4	101	1148	Yes
Potri.003G058200	similar to cyclin; putative; similar to cyclin A2 (Lycopersicon esculentum) GI:5420276; similar to cyclin (Medicago sativa) GI:1050559; similar to N-terminal domain; similar to C-terminal domain; [ co	POPTR_0003s05690, gw1.III.684.1, AT1G80370,CYCA2;4	!v3,!h	AT1G80370	Cyclin A2;4	43	6386
Potri.003G103600		POPTR_0003s10260, AT1G31830,	!v3,!a	AT1G31830	Amino acid permease family protein	25	4873
Potri.003G141800	glutaredoxin family protein; [ ortholog of At1g64500,]	POPTR_0003s14170, eugene3.00031141, AT1G64500,	!v3,!a	AT1G64500	Glutaredoxin family protein	64	2879
Potri.003G155700		POPTR_0003s15440, AT3G12720,ATMYB67,ATY53,MYB67	!v3,!TF,!e	AT3G12720	myb domain protein 67	104	847	Yes
Potri.003G217000		POPTR_0003s21390, grail3.4736000101, grail3.0136006501, AT2G44300,	!v3,!h	AT2G44300	Bifunctional inhibitor/lipid-transfer protein/seed storage 2S albumin superfamily protein	30	3470
Potri.004G003900	similar to expressed protein in Arabidopsis thaliana; [ ortholog of At4g22190,]	POPTR_0004s00560, eugene3.01660042, AT4G22190,	!v3,!e	AT4G22190	unknown	93	1118	Yes
Potri.005G024900		POPTR_0005s02480, eugene3.01330040, AT5G03980,	!v3,!h	AT5G03980	SGNH hydrolase-type esterase superfamily protein	72	1758	Yes
Potri.005G150400		POPTR_0005s19410, fgenesh4_pg.C_LG_V000660, AT5G64410,ATOPT4,OPT4	!v3,!e	AT5G64410	oligopeptide transporter 4	94	1174	Yes
Potri.006G061400		POPTR_0006s06010, fgenesh4_pg.C_scaffold_152000045, AT2G12462,	!v3,!e	AT2G12462	unknown	77	1568	Yes
Potri.006G245000	similar to ARABIDOPSIS THALIANA K+ RECTIFYING CHANNEL; similar to POTASSIUM CHANNEL 1; [ co-ortholog (2of5) of At4g32650, ]	POPTR_0006s26140, Pt-ATKC1.4, fgenesh4_pm.C_LG_VI000755, AT4G32650,ATKC1,AtLKT1,KAT3,KC1	!v3,!e	AT4G32650	potassium channel in Arabidopsis thaliana 3	49	2285	Yes
Potri.006G272700		POPTR_0006s28750, eugene3.01470010, AT1G78570,ATRHM1,RHM1,ROL1	!v3,!h	AT1G78570	rhamnose biosynthesis 1	104	685	Yes
Potri.007G073700		, AT5G23270,ATSTP11,STP11	!v3,!miR,!h	AT5G23270	sugar transporter 11	112	3084
Potri.007G073800		POPTR_0007s07550, fgenesh4_pm.C_LG_VII000265, AT3G19940,	!v3,!miR,!h	AT3G19940	Major facilitator superfamily protein	149	94	Yes
Potri.008G098100		,NULL,	!v3,!e	NULL	NULL	83	1306	Yes
Potri.009G026800	beta-ketoacyl-CoA synthase family protein; similar to GB:AAC99312 from (Arabidopsis thaliana) (Plant J. (1999) In press); [ ortholog of At1g07720,At2g28630,]	POPTR_0009s03190, fgenesh4_pm.C_LG_IX000632, AT2G28630,KCS12	!v3,!e	AT2G28630	3-ketoacyl-CoA synthase 12	84	3345
Potri.009G029000		POPTR_0009s03430, AT5G59305,	!v3,!e	AT5G59305	unknown	33	4076
Potri.009G068100	F-box family protein; similar to SKP1 interacting partner 2 (SKIP2) TIGR_Ath1:At5g67250; [ co-ortholog (1of2) of At2g32560, At2g26850, ]	POPTR_0009s07230, eugene3.00090969, AT2G32560,	!v3,!h	AT2G32560	F-box family protein	74	1827	Yes
Potri.009G113600	similar to putative sorbitol transporter. [ORG:Prunus cerasus]; [ co-ortholog (1of2) of At2g16120, AAM44082, At2g16130, ]	POPTR_0009s11650, Pt-SORT2.2, PtrPLT, fgenesh4_pg.C_LG_IX000516, AT3G18830,ATPLT5,ATPMT5,PMT5	!v3,!h	AT3G18830	polyol/monosaccharide transporter 5	107	342	Yes
Potri.009G131000		POPTR_0009s13350, AT2G21100,	!v3,!e	AT2G21100	Disease resistance-responsive (dirigent-like protein) family protein	64	1747	Yes
Potri.010G011400		POPTR_0010s01500, AT5G49130,	!v3,!h	AT5G49130	MATE efflux family protein	74	132	Yes
Potri.010G166800	oxygen evolving enhancer 3 (PsbQ) family protein; similar to extrinsic pII protein; oxygen evolving enhancer 3 (PsbQ) family protein; similar to extrinsic pII protein; [ ortholog of At1g14150,]	POPTR_0010s17400, estExt_fgenesh4_pg.C_LG_X1487, AT1G14150,PQL1,PQL2	!v3,!e	AT1G14150	PsbQ-like 2	90	601	Yes
Potri.010G168100		POPTR_0010s17520, AT1G14185,	!v3,!e	AT1G14185	Glucose-methanol-choline (GMC) oxidoreductase family protein	59	2279	Yes
Potri.011G045000	similar to glycine-rich protein; [ co-ortholog (1of2) of At4g21620, ]	POPTR_0011s04480, eugene3.00110292, AT4G21620,	!v3,!e	AT4G21620	glycine-rich protein	91	6764
Potri.011G115600	ERF49	POPTR_0011s11620, ERF49, Pt-RAP2.2, grail3.0014007501, AT3G15210,ATERF-4,ATERF4,ERF4,RAP2.5	!v3,!TF,!a	AT3G15210	ethylene responsive element binding factor 4	20	1993	Yes
Potri.011G138200	calcineurin-like phosphoesterase family protein; [ co-ortholog (2of2) of At3g20500, ]	POPTR_0011s14130, fgenesh4_pm.C_LG_XI000369, AT3G20500,ATPAP18,PAP18	!v3,!d	AT3G20500	purple acid phosphatase 18	51	8019
Potri.011G146800	phospholipid/glycerol acyltransferase family protein; similar to SP|Q16635|Tafazzin from Homo sapiens ; [ ortholog of At1g78690,]	POPTR_0011s14980, gw1.XI.759.1, AT1G78690,	!v3,!h	AT1G78690	Phospholipid/glycerol acyltransferase family protein	69	6157
Potri.011G164300		POPTR_0011s16720, AT5G14980,	!v3,!e	AT5G14980	alpha/beta-Hydrolases superfamily protein	97	2211	Yes
Potri.012G031900		POPTR_0012s01360, AT5G41761,	!v3,!h	AT5G41761	unknown	99	374	Yes
Potri.012G051500		POPTR_0012s04840, AT3G18170,	!v3,!e	AT3G18170	Glycosyltransferase family 61 protein	120	331	Yes
Potri.013G001000		POPTR_0013s00290, AT1G09540,ATMYB61,MYB61	MYB	AT1G09540	myb domain protein 61	58	2221	Yes
Potri.013G005700	similar to putative xyloglucan endotransglycosylase. [ORG:Cucumis sativus]; [ ortholog of CAD88260,At4g30270,CAD87535,CAD87536,At4g25810,CAA10231,BAB86890,CAD88261,At5g57560,CAD87534,]	POPTR_0013s00710, Pt-XTH3.1, eugene3.00130049, AT4G25810,XTH23,XTR6	!v3,!e	AT4G25810	xyloglucan endotransglycosylase 6	86	1689	Yes
Potri.013G027100	similar to expressed protein in Arabidopsis thaliana; [ co-ortholog (1of2) of At1g54740, ]	POPTR_0013s02810, eugene3.00130256, AT1G54740,	!v3,!e	AT1G54740	Protein of unknown function (DUF3049)	31	7152
Potri.013G057500		, AT5G56540,AGP14,ATAGP14	!v3,!h	AT5G56540	arabinogalactan protein 14	59	2075	Yes
Potri.013G114800	similar to Expressed protein in Arabidopsis thaliana; [ co-ortholog (1of2) of At1g34350, ]	POPTR_0013s11920, gw1.41.187.1, AT1G34350,	!v3,!h	AT1G34350	unknown	22	4848
Potri.013G120600		POPTR_0013s12490, AT2G20520,FLA6	!v3,!e	AT2G20520	FASCICLIN-like arabinogalactan 6	51	6454
Potri.014G071200		POPTR_0014s06690, estExt_fgenesh4_pg.C_LG_XIV0161, AT3G60890,ZPR2	!v3,!h	AT3G60890	protein binding	141	148	Yes
Potri.014G117100		POPTR_0014s11240, AT5G19730,	!v3,!h	AT5G19730	Pectin lyase-like superfamily protein	123	143	Yes
Potri.014G132600		POPTR_0014s12710, AT2G47810,NF-YB5	!v3,!TF,!a	AT2G47810	nuclear factor Y, subunit B5	71	425	Yes
Potri.015G038800		POPTR_0015s04560, AT5G12250,TUB6	!v3,!h	AT5G12250	beta-6 tubulin	28	8379
Potri.015G042900		POPTR_0015s04130, AT3G18200,	!v3,!miR,!h	AT3G18200	nodulin MtN21 /EamA-like transporter family protein	124	2775	Yes
Potri.017G044800		POPTR_0017s07230, AT5G09530,	!v3,!e	AT5G09530	hydroxyproline-rich glycoprotein family protein	83	3788
Potri.018G028000	ERF118	POPTR_0018s01680, gw1.XVIII.1599.1, AT5G25390,SHN2	!v3,!TF,!e	AT5G25390	Integrase-type DNA-binding superfamily protein	126	206	Yes
Potri.018G091200		POPTR_0018s09860, AT2G18890,	!v3,!h	AT2G18890	Protein kinase superfamily protein	65	3032
Potri.018G099100	similar to expressed protein in Arabidopsis thaliana; similar to cDNA bHLH transcription factor (bHLH eta gene) gi:32563007; similar to expressed protein in Arabidopsis thaliana; similar to cDNA bHLH	POPTR_0018s10810, eugene3.00180893, AT4G30410,	!v3,!e	AT4G30410	sequence-specific DNA binding transcription factors	78	1625	Yes
Potri.019G063600	pfkB-type carbohydrate kinase family protein; [ ortholog of At4g10260,]	POPTR_0019s09200, gw1.125.171.1, AT4G10260,	!v3,!h	AT4G10260	pfkB-like carbohydrate kinase family protein	117	18	Yes
Potri.019G118600		POPTR_0019s14110, eugene3.00191050, AT4G03270,CYCD6;1	!v3,!e	AT4G03270	Cyclin D6;1	68	3475
Potri.T011000		POPTR_0019s00790, AT1G10940,ASK1,SNRK2-4,SNRK2.4,SRK2A	!v3,!h	AT1G10940	Protein kinase superfamily protein	24	4916
Potri.T093500		POPTR_0018s10410, AT4G30320,	!v3,!e	AT4G30320	CAP (Cysteine-rich secretory proteins, Antigen 5, and Pathogenesis-related 1 protein) superfamily protein	58	138	Yes
Potri.T106200		, AT5G15180,	!v3,!h	AT5G15180	Peroxidase superfamily protein	115	991	Yes

## Sheet: ERF27
Gene id	Description	Synonyms	Attr	ortholog	at desc	deg	btw_rank	Hubs(=top20 %)	Ethylene-responsive Gene	Co-expressed gene of ethyl-reg.TF (Table S8)
Potri.001G070200		POPTR_0001s12740, eugene3.00010571, AT5G32450,	!v3,!g	AT5G32450	RNA binding (RRM/RBD/RNP motifs) family protein	119	97	Yes
Potri.001G076900		,NULL,	!v3,!a	NULL	NULL	18	2038	Yes
Potri.001G455400	similar to adventitious rooting related oxygenase. [ORG:Malus x domestica]; [ co-ortholog (1of2) of At1g14130, CAA12386, T17000, At1g14120, ]	POPTR_0001s45960, Pt-ARRO.2, 2OGox14, estExt_fgenesh4_pg.C_LG_I3206, AT1G14130,	!v3,!miR,!f	AT1G14130	2-oxoglutarate (2OG) and Fe(II)-dependent oxygenase superfamily protein	89	329	Yes
Potri.001N004200		,NULL,NULL	,!nv	NULL	NULL	25	7886
Potri.002G031700		POPTR_0002s03310, gw1.II.3355.1, AT2G04520,	!v3,!d	AT2G04520	Nucleic acid-binding, OB-fold-like protein	43	303	Yes
Potri.002G048000		POPTR_0002s04880, AT4G02670,AtIDD12,IDD12	!v3,!TF,!e	AT4G02670	indeterminate(ID)-domain 12	26	4603
Potri.002N009200		,NULL,NULL	,!nv	NULL	NULL	23	3768
Potri.003G070600		POPTR_0003s06830, AT3G14200,	!v3,!d	AT3G14200	Chaperone DnaJ-domain superfamily protein	52	76	Yes	Yes
Potri.003G173500		POPTR_0003s17200, AT1G74110,CYP78A10	!v3,!g	AT1G74110	cytochrome P450, family 78, subfamily A, polypeptide 10	54	2746	Yes
Potri.004G028000	similar to Brassica self-incompatibility (S) locus. Expressed in root. Shoot expression limited to limited to the root-hypocotyl transition zone and at the base of lateral roots as; [ ortholog of At4g	POPTR_0004s02720, fgenesh4_pg.C_LG_IV000163, Pt-ARK3.1, POPTR_0004s02710, AT4G21380,ARK3,RK3	!v3,!miR,!g	AT4G21380	receptor kinase 3	87	271	Yes
Potri.004G117500		POPTR_0004s11650, AT1G13680,	!v3,!d	AT1G13680	PLC-like phosphodiesterases superfamily protein	44	462	Yes
Potri.004G184000		POPTR_0004s19470, estExt_fgenesh4_pm.C_LG_IV0578, AT5G25940,	!v3,!b	AT5G25940	early nodulin-related	29	2473	Yes
Potri.005G072500		POPTR_0005s07360, eugene3.00050115, AT5G65280,GCL1	!v3,!a	AT5G65280	GCR2-like 1	30	1552	Yes
Potri.005G083200		POPTR_0005s08490, AT5G64940,ATATH13,ATH13,ATOSA1,OSA1	!v3,!miR,!c	AT5G64940	ABC2 homolog 13	61	1574	Yes
Potri.005G223300	ERF27	POPTR_0005s24470, AT3G23240,ATERF1,ERF1	!v3,!TF,!g	AT3G23240	ethylene response factor 1	73	171	Yes
Potri.005G240400		,NULL,	!v3,!a	NULL	NULL	15	1898	Yes
Potri.007G033400	similar to expressed protein in Arabidopsis thaliana; [ co-ortholog (2of2) of At2g23690, At4g37240, ]	POPTR_0007s12090, estExt_fgenesh4_pg.C_LG_VII0989, AT2G23690,	!v3,!a	AT2G23690	unknown	52	52	Yes	Yes
Potri.007G105800		POPTR_0007s04170, AT4G33440,	!v3,!a	AT4G33440	Pectin lyase-like superfamily protein	77	2537	Yes
Potri.008G066700	similar to pleckstrin homology (PH) domain-containing protein; similar to AtPH1 (Arabidopsis thaliana) GI:5926716; [ co-ortholog (1of2) of At5g05710, ]	POPTR_0008s06660, fgenesh4_pg.C_LG_VIII000566, AT5G05710,	!v3,!f	AT5G05710	Pleckstrin homology (PH) domain superfamily protein	34	3743
Potri.008G194200	similar to glycine-rich protein; [ co-ortholog (1of3) of At1g27090, ]	POPTR_0008s19880, eugene3.00081837, AT1G27090,	!v3,!f	AT1G27090	glycine-rich protein	13	8700
Potri.009G138700		POPTR_0009s14070, eugene3.00090306,NULL,	!v3,!a	NULL	NULL	29	1048	Yes
Potri.010G050900		POPTR_0010s06070, AT1G24530,	!v3,!d	AT1G24530	Transducin/WD40 repeat-like superfamily protein	51	23	Yes
Potri.010G093400	similar to homeobox-leucine zipper protein; putative; similar to HD-ZIP transcription factor; putative; similar to homeobox-leucine zipper protein HAT7 (HD-ZIP protein 7) (HD-ZIP protein ATHB-3 (SP:Q0	POPTR_0010s10340, estExt_fgenesh4_pg.C_LG_X0852, Pt-ATHB13.3, AT1G69780,ATHB13	!v3,!TF,!g	AT1G69780	Homeobox-leucine zipper protein family	76	1006	Yes
Potri.010G097600		POPTR_0010s10770, POPTR_0010s10780, AT3G11920,	!v3,!a	AT3G11920	glutaredoxin-related	79	2261	Yes
Potri.011G064700		POPTR_0011s07550, AT2G34070,TBL38	!v3,!miR,!a	AT2G34070	TRICHOME BIREFRINGENCE-LIKE 37	18	2690	Yes
Potri.012G015100		POPTR_0012s02230, estExt_fgenesh4_pg.C_LG_XII0203, AT5G24270,ATSOS3,CBL4,SOS3	!v3,!g	AT5G24270	Calcium-binding EF-hand family protein	63	9	Yes
Potri.012G015200		,NULL,	!v3,!a	NULL	NULL	32	741	Yes
Potri.012G016600		POPTR_0012s02370, fgenesh4_pg.C_LG_XII000217, AT5G53020,	!v3,!miR,!g	AT5G53020	Ribonuclease P protein subunit P38-related	127	1388	Yes		Yes
Potri.012G041800	similar to hydrolase; alpha/beta fold family protein; similar to monoglyceride lipase from (Homo sapiens) GI:14594904; similar to (Mus musculus) GI:2632162; similar to (Rattus norvegicus) GI:19697886;	POPTR_0012s03860, POPTR_0012s03870, grail3.0031002401, AT1G73480,	!v3,!miR,!a	AT1G73480	alpha/beta-Hydrolases superfamily protein	24	1507	Yes
Potri.012G140700		POPTR_0012s13240, AT3G61250,AtMYB17,MYB17	!v3,!TF,!f	AT3G61250	myb domain protein 17	28	5618
Potri.013G010800		POPTR_0013s01210, AT1G56300,	!v3,!a	AT1G56300	Chaperone DnaJ-domain superfamily protein	56	4346
Potri.014G151900	similar to expressed protein in Arabidopsis thaliana; similar to expressed protein in Arabidopsis thaliana; [ co-ortholog (2of2) of At3g21710, ]	POPTR_0014s15000, eugene3.00140991, AT3G21710,	!v3,!a	AT3G21710	unknown	39	1286	Yes
Potri.015G027700		POPTR_0015s05670, eugene3.01220019, AT3G16520,UGT88A1	!v3,!g	AT3G16520	UDP-glucosyl transferase 88A1	83	49	Yes
Potri.015G027800		POPTR_0015s05660, AT3G16520,UGT88A1	!v3,!g	AT3G16520	UDP-glucosyl transferase 88A1	106	140	Yes
Potri.015G137300		POPTR_0015s13750, eugene3.00151155, AT5G51970,	!v3,!a	AT5G51970	GroES-like zinc-binding alcohol dehydrogenase family protein	75	895	Yes
Potri.015G137400		POPTR_0015s13740, fgenesh4_pg.C_LG_XV001080,NULL,	!v3,!g	NULL	NULL	77	1643	Yes	Yes
Potri.015G144400		POPTR_0015s13090, AT5G23850,	!v3,!a	AT5G23850	Arabidopsis thaliana protein of unknown function (DUF821)	39	397	Yes
Potri.015N010300		,NULL,NULL	,!nv	NULL	NULL	69	4775
Potri.016G061000		POPTR_0016s06100, gw1.XVI.1936.1, AT1G58170,	!v3,!miR,!a	AT1G58170	Disease resistance-responsive (dirigent-like protein) family protein	158	393	Yes		Yes
Potri.018G045100	similar to class III HD-Zip protein. [ORG:Populus alba x Populus tremula]; [ co-ortholog (2of6) of AAS77254, ]	POPTR_0018s08110, fgenesh4_pg.C_LG_XVIII000250, Pt-HB1.5, AT4G32880,ATHB-8,ATHB8,HB-8	!v3,!TF,!miR,!f	AT4G32880	homeobox gene 8	62	388	Yes
Potri.019G004100	nodulin MtN21 family protein; similar to MtN21 GI:2598575 (root nodule development) from (Medicago truncatula); [ co-ortholog (1of2) of At5g64700, ]	POPTR_0019s01810, eugene3.01170074, N21L8, AT5G64700,	!v3,!g	AT5G64700	nodulin MtN21 /EamA-like transporter family protein	103	1079	Yes
Potri.019G085800	similar to sucrose transporter. [ORG:Juglans regia]; [ ortholog of At1g22710,AAD41024,T12198,CAB07811,BAC44864,S43142,CAD19053,AAU11810,CAA83436,]	POPTR_0019s11560, gw1.XIX.2155.1, Pt-SUC2.1, AT1G22710,ATSUC2,SUC2,SUT1	!v3,!g	AT1G22710	sucrose-proton symporter 2	30	8325
Potri.T092000		POPTR_0064s00240, AT3G05660,AtRLP33,RLP33	!v3,!g	AT3G05660	receptor like protein 33	98	117	Yes
Potri.T124000		, AT1G24530,	!v3,!d	AT1G24530	Transducin/WD40 repeat-like superfamily protein	55	85	Yes

## Sheet: ERF119
Gene id	Description	Synonyms	Attr	ortholog	at desc	deg	btw_rank	Hubs(=top20 %)	Ethylene-responsive Gene	Co-expressed gene of ethyl-reg.TF (Table S8)
Potri.001G068100	exostosin family protein; [ co-ortholog (1of2) of At1g27440, ]	POPTR_0001s12940, grail3.0008017001, AT1G27440,ATGUT1,GUT2,IRX10	!v3,!g	AT1G27440	Exostosin family protein	105	5418
Potri.001G141000		,NULL,	!v3,!g	NULL	NULL	92	4933
Potri.001G189500	ABC transporter family protein; similar to gb|Z70524|GI 1514643:PDR5 like-ABC transporter from Spirodela polyrrhiza and is a member of the PF|00005 ABC|transporter family ESTs gb|N97039. and gb|T43169	POPTR_0001s19030, estExt_Genewise1_v1.C_LG_I0381, PDR8, AT1G59870,ABCG36,ATABCG36,ATPDR8,PDR8,PEN3	!v3,!g	AT1G59870	ABC-2 and Plant PDR ABC-type transporter family protein	131	1168	Yes
Potri.001G320800	similar to fasciclin-like AGP 15. [ORG:Populus alba x Populus tremula]; [ co-ortholog (1of20) of AAT37948, AAT37945, AAT37951, AAT37947, AAT37946, AAT37949, AAD56235, AAT37953, AAT37958, AAT37957, AAT	POPTR_0001s32800, PtrFLA14-8, eugene3.00012224, Pt-FLA14.8, AT5G03170,ATFLA11,FLA11	!v3,!g	AT5G03170	FASCICLIN-like arabinogalactan-protein 11	139	1605	Yes
Potri.001G416800		POPTR_0001s44250, estExt_fgenesh4_pm.C_LG_XIII0357, AT5G54690,GAUT12,IRX8,LGT6	!v3,!miR,!g	AT5G54690	galacturonosyltransferase 12	122	6759
Potri.001G436400		POPTR_0001s42730, AT1G17200,	!v3,!g	AT1G17200	Uncharacterised protein family (UPF0497)	130	577	Yes
Potri.002G184900	similar to GERMIN-LIKE PROTEIN 10; [ co-ortholog (1of2) of At3g62020, ]	POPTR_0002s18570, grail3.0039027801, Pt-GLP10.1, AT3G62020,GLP10	!v3,!g	AT3G62020	germin-like protein 10	66	4179
Potri.003G073800	lipase class 3 family protein; similar to low similarity to Chain A; similar to Lipase Ii From Rhizopus Niveus GI:1942798; [ co-ortholog (1of2) of At3g14360, ]	POPTR_0003s07140, fgenesh4_pg.C_LG_III000532, AT3G14360,	!v3,!g	AT3G14360	alpha/beta-Hydrolases superfamily protein	90	290	Yes
Potri.003G100200	similar to pinoresinol-lariciresinol reductase; putative; similar to pinoresinol-lariciresinol reductase TH1 (Tsuga heterophylla)(GI:7578915); [ co-ortholog (1of2) of At4g13660, At1g32100, ]	POPTR_0003s09950, PCBERp8, grail3.0018006801, AT1G32100,ATPRR1,PRR1	!v3,!g	AT1G32100	pinoresinol reductase 1	107	3583
Potri.004G039700		POPTR_0004s03980, AT3G51000,	!v3,!g	AT3G51000	alpha/beta-Hydrolases superfamily protein	121	2905
Potri.004G053500	transferase family protein; similar to elicitor inducible gene product EIG-I24 (Nicotiana tabacum) (gi:10798748); [ ortholog of At1g28680,]	POPTR_0004s05280, eugene3.00040425, AT1G28680,	!v3,!g	AT1G28680	HXXXD-type acyl-transferase family protein	116	5318
Potri.005G061600		POPTR_0005s06280, AT3G18660,GUX1,PGSIP1	!v3,!g	AT3G18660	plant glycogenin-like starch initiation protein 1	123	4846
Potri.005G109600		POPTR_0005s11150, AT3G51325,	!v3,!g	AT3G51325	RING/U-box superfamily protein	114	1355	Yes
Potri.006G056100		POPTR_0006s05480,NULL,	!v3,!g	NULL	NULL	93	8154
Potri.006G056200		POPTR_0006s05490, AT2G41905,	!v3,!g	AT2G41905	unknown	29	8013
Potri.006G094300		POPTR_0006s09540, AT3G54040,	!v3,!g	AT3G54040	PAR1 protein	155	1937	Yes
Potri.006G131000		POPTR_0006s13320, AT2G37090,IRX9	!v3,!g	AT2G37090	Nucleotide-diphospho-sugar transferases superfamily protein	124	1190	Yes
Potri.006G177600		, AT4G30420,	!v3,!g	AT4G30420	nodulin MtN21 /EamA-like transporter family protein	146	1615	Yes
Potri.006G253800	ERF119	POPTR_0006s26990, eugene3.00061852, DREB28, AT5G25390,SHN2	!v3,!TF,!g	AT5G25390	Integrase-type DNA-binding superfamily protein	107	2068	Yes
Potri.007G135300	no apical meristem (NAM) family protein; [ co-ortholog (2of2) of At4g28500, ]	POPTR_0007s01350, eugene3.00070120, AT4G28500,ANAC073,NAC073,SND2	!v3,!TF,!miR,!g	AT4G28500	NAC domain containing protein 73	156	1085	Yes
Potri.008G112300		POPTR_0008s11150, AT1G13635,	!v3,!g	AT1G13635	DNA glycosylase superfamily protein	140	1549	Yes
Potri.009G045900		POPTR_0009s05050, eugene3.00091186, AT5G60440,AGL62	!v3,!TF,!g	AT5G60440	AGAMOUS-like 62	129	125	Yes
Potri.010G038900		POPTR_0010s04830, AT1G27210,	!v3,!g	AT1G27210	ARM repeat superfamily protein	135	1914	Yes
Potri.010G069100	similar to alcohol oxidase-related; similar to long chain fatty alcohol oxidase from Candida cloacae (GI:6983581); similar to Candida tropicalis (GI:6983594); [ co-ortholog (2of3) of At3g23410, ]	POPTR_0010s07980, fgenesh4_pg.C_LG_X000365, AT3G23410,ATFAO3,FAO3	!v3,!g	AT3G23410	fatty alcohol oxidase 3	156	5326
Potri.010G096000	Bet 5 1 allergen family protein; similar to major pollen allergen Bet 5 1 GB:CAA96544 GI:1321726 from (Betula pendula); [ ortholog of At1g24020,]	POPTR_0010s10600, estExt_Genewise1_v1.C_LG_X6115, AT1G24020,MLP423	!v3,!g	AT1G24020	MLP-like protein 423	61	4177
Potri.010G194800		POPTR_0010s20200, fgenesh4_pg.C_LG_X001765,NULL,	!v3,!g	NULL	NULL	15	8771
Potri.011G096500		POPTR_0011s09880, AT3G15050,IQD10	!v3,!g	AT3G15050	IQ-domain 10	127	4934
Potri.011G132600		POPTR_0011s13600, eugene3.00111083, AT5G54690,GAUT12,IRX8,LGT6	!v3,!g	AT5G54690	galacturonosyltransferase 12	112	1578	Yes
Potri.011G136800		,NULL,	!v3,!g	NULL	NULL	33	1819	Yes
Potri.014G022600		POPTR_0014s02270, AT3G53010,	!v3,!g	AT3G53010	Domain of unknown function (DUF303)	74	3791
Potri.014G119900	similar to expressed protein in Arabidopsis thaliana; [ co-ortholog (1of2) of At2g47360, ]	POPTR_0014s11500, eugene3.00140652, AT2G47360,	!v3,!g	AT2G47360	unknown	153	1054	Yes
Potri.014G175100		,NULL,	!v3,!g	NULL	NULL	89	2699	Yes
Potri.015G005300		, AT3G49400,	!v3,!g	AT3G49400	Transducin/WD40 repeat-like superfamily protein	62	3137
Potri.015G060200	similar to phytochelatin synthetase-like protein. [ORG:Phaseolus vulgaris]; [ co-ortholog (1of3) of AAR13305, ]	POPTR_0015s07120, fgenesh4_pg.C_scaffold_129000054, AT5G15630,COBL4,IRX6	!v3,!g	AT5G15630	COBRA-like extracellular glycosyl-phosphatidyl inositol-anchored protein family	138	1498	Yes
Potri.016G038600		, AT3G57070,	!v3,!miR,!g	AT3G57070	Glutaredoxin family protein	107	2334	Yes
Potri.018G052500	similar to expressed protein in Arabidopsis thaliana; [ co-ortholog (1of2) of At5g11890, ]	POPTR_0018s05260, estExt_Genewise1_v1.C_LG_XVIII0915, AT5G11890,	!v3,!g	AT5G11890	unknown	124	4498
Potri.018G103900		POPTR_0018s11290, AT5G17420,ATCESA7,CESA7,IRX3,MUR10	!v3,!g	AT5G17420	Cellulose synthase family protein	165	2792	Yes
Potri.019G127400	similar to expressed protein in Arabidopsis thaliana; similar to expression supported by MPSS; [ co-ortholog (2of2) of At1g06930, ]	POPTR_0019s14800, fgenesh4_pg.C_LG_XIX000970, AT1G06930,	!v3,!g	AT1G06930	unknown	74	804	Yes
Potri.T091700		POPTR_0064s00290, grail3.0025024002, AT5G01650,	!v3,!miR,!g	AT5G01650	Tautomerase/MIF superfamily protein	53	4823
Potri.T092000		POPTR_0064s00240, AT3G05660,AtRLP33,RLP33	!v3,!g	AT3G05660	receptor like protein 33	98	117	Yes
GO id	Pval (corrected)	Statistics	Description
GO:0016757	0.009205	5/18 | 419/14306	transferase activity, transferring glycosyl groups

## Sheet: ERF83
Gene id	Description	Synonyms	Attr	ortholog	at desc	deg	btw_rank	Hubs(=top20 %)	Ethylene-responsive Gene	Co-expressed gene of ethyl-reg.TF (Table S8)
Potri.001G379100		,NULL,	!v3,!a	NULL	NULL	1	10857
Potri.002G167400	ERF83	POPTR_0002s16900, AT4G27950,CRF4	!v3,!TF,!a	AT4G27950	cytokinin response factor 4	15	1023	Yes
Potri.003G088900	protein kinase family protein; similar to protein kinase domain containing protein; [ ortholog of At5g46570,]	POPTR_0003s08720, eugene3.01180039, AT5G46570,BSK2	!v3,!e	AT5G46570	BR-signaling kinase 2	2	10857
Potri.003G210400		POPTR_0003s22100, AT5G12890,	!v3,!g	AT5G12890	UDP-Glycosyltransferase superfamily protein	2	10857
Potri.004F001100		,NULL,NULL	,!nv	NULL	NULL	43	214
Potri.004G158300	similar to DNAJ heat shock N-terminal domain-containing protein; similar to SP|P39101|CAJ1 protein ; similar to Saccharomyces cerevisiae; [ co-ortholog (2of2) of At2g21510, At4g39150, ]	POPTR_0004s16570, gw1.IV.646.1, AT4G39150,	!v3,!a	AT4G39150	DNAJ heat shock N-terminal domain-containing protein	33	2144	Yes
Potri.006G074400		POPTR_0006s07390, AT3G28345,	!v3,!a	AT3G28345	ABC transporter family protein	7	7230
Potri.013G067600		POPTR_0013s06400, AT1G08710,	!v3,!a	AT1G08710	F-box family protein	7	6228
Potri.015G070600	similar to Betaine-aldehyde dehydrogenase; similar to chloroplast precursor (EC 1.2.1.8) (BADH).; [ co-ortholog (1of2) of At1g74920, ]	POPTR_0015s08190, grail3.0005005501, Pt-ALDH10.2, AT1G74920,ALDH10A8	!v3,!miR,!a	AT1G74920	aldehyde dehydrogenase 10A8	13	2152	Yes
Potri.016G097100		POPTR_0016s10920, estExt_Genewise1_v1.C_LG_XVI3058, AT1G32700,	!v3,!a	AT1G32700	PLATZ transcription factor family protein	6	6539
Potri.017G075000		POPTR_0017s11140, AT3G28470,ATMYB35,TDF1	!v3,!TF,!a	AT3G28470	Duplicated homeodomain-like superfamily protein	16	1403	Yes

## Sheet: ERF75
Gene id	Description	Synonyms	Attr	ortholog	at desc	deg	btw_rank	Hubs(=top20 %)	Ethylene-responsive Gene	Co-expressed gene of ethyl-reg.TF (Table S8)
Potri.001G112600		POPTR_0001s08470, eugene3.00010981, AT4G22920,ATNYE1,NYE1	!v3,!miR,!d	AT4G22920	non-yellowing 1	27	2091	Yes		Yes
Potri.002G065600	ERF75	POPTR_0002s06620, AT5G50080,	!v3,!TF,!d	AT5G50080	ethylene response factor 110	14	2053	Yes	Yes	Yes
Potri.006G248300	similar to expressed protein in Arabidopsis thaliana; similar to expressed protein in Arabidopsis thaliana; [ ortholog of At2g25625,]	POPTR_0006s26440, estExt_fgenesh4_pg.C_LG_VI1734, AT2G25625,	!v3,!d	AT2G25625	unknown	8	7140			Yes
Potri.014G182800		POPTR_0014s18110, eugene3.00141324, AT2G16230,	!v3,!c	AT2G16230	O-Glycosyl hydrolases family 17 protein	14	7364			Yes
Potri.016G068600	similar to syntaxin 121 (SYP121); similar to syntaxin-related protein (SYR1); similar to cDNA syntaxin-related protein At-SYR1 (At-Syr1) GI:4206788; similar to SP|Q9ZSD4 Syntaxin 121 (AtSYP121) (Synta	POPTR_0016s06910, Pt-SYP121.1, gw1.XVI.2174.1, AT3G11820,AT-SYR1,ATSYP121,ATSYR1,PEN1,SYP121,SYR1	!v3,!e	AT3G11820	syntaxin of plants 121	22	811	Yes		Yes
Potri.018G031900		, AT4G30380,	!v3,!d	AT4G30380	Barwin-related endoglucanase	13	6942			Yes

## Sheet: ERF76
Gene id	Description	Synonyms	Attr	ortholog	at desc	deg	btw_rank	Hubs(=top20 %)	Ethylene-responsive Gene	Co-expressed gene of ethyl-reg.TF (Table S8)
Potri.004G156500		POPTR_0004s16380,NULL,	!v3,!a	NULL	NULL	3	1007	Yes		Yes
Potri.005G195000	ERF76	POPTR_0005s21690, fgenesh4_pg.C_LG_V001123, ERF76, AT5G64750,ABR1	!v3,!TF,!a	AT5G64750	Integrase-type DNA-binding superfamily protein	8	2387	Yes	Yes	Yes
Potri.012G055600		POPTR_0012s05200, AT1G68320,AtMYB62,BW62B,BW62C,MYB62	!v3,!TF,!a	AT1G68320	myb domain protein 62	33	431	Yes		Yes
Potri.013G017400	similar to RALF-LIKE 23; [ co-ortholog (2of3) of At3g16570, At4g15800, ]	POPTR_0013s01810, Pt-RALFL23.3, estExt_Genewise1_v1.C_LG_XIII0862, AT1G02900,ATRALF1,RALF1,RALFL1	!v3,!a	AT1G02900	rapid alkalinization factor 1	50	221	Yes		Yes

## Sheet: At_GOterm
AT3G13650		GO id	Pval (corrected)	Statistics	Description
AT5G51920		GO:0009807	0.0005898	4/143 | 16/24222	lignan biosynthetic process
AT2G26770		GO:0009834	0.0009477	4/143 | 21/24222	secondary cell wall biogenesis
AT5G42250		GO:0045492	0.002035	2/143 | 2/24222	xylan biosynthetic process
AT2G38020		GO:0010413	0.002035	2/143 | 2/24222	glucuronoxylan metabolic process
AT1G22330		GO:0010417	0.002299	3/143 | 10/24222	glucuronoxylan biosynthetic process
AT1G09970		GO:0042991	0.02505	2/143 | 6/24222	transcription factor import into nucleus
AT2G44710		GO:0006355	0.03139	19/143 | 1388/24222	regulation of transcription, DNA-dependent
AT5G53370
AT1G60950
AT5G64570
AT1G80370
AT1G31830			Description	Pval (corrected)
AT1G64500			lignan biosynthetic process	0.0005898
AT3G12720			secondary cell wall biogenesis	0.0009477
AT2G44300			xylan biosynthetic process	0.002035
AT4G22190			glucuronoxylan metabolic process	0.002035
AT5G03980			glucuronoxylan biosynthetic process	0.002299
AT5G64410			transcription factor import into nucleus	0.02505
AT2G12462			regulation of transcription, DNA-dependent	0.03139
AT4G32650
AT1G78570
AT5G23270
AT3G19940
AT2G28630
AT5G59305
AT2G32560
AT3G18830
AT2G21100
AT5G49130
AT1G14150
AT1G14185
AT4G21620
AT3G15210
AT3G20500
AT1G78690
AT5G14980
AT5G41761
AT3G18170
AT1G09540
AT4G25810
AT1G54740
AT5G56540
AT1G34350
AT2G20520
AT3G60890
AT5G19730
AT2G47810
AT5G12250
AT3G18200
AT5G09530
AT5G25390
AT2G18890
AT4G30410
AT4G10260
AT4G03270
AT1G10940
AT4G30320
AT5G15180
AT4G22920
AT5G50080
AT2G25625
AT2G16230
AT3G11820
AT4G30380
AT1G27440
AT1G59870
AT5G03170
AT5G54690
AT1G17200
AT3G62020
AT3G14360
AT1G32100
AT3G51000
AT1G28680
AT3G18660
AT3G51325
AT2G41905
AT3G54040
AT2G37090
AT4G30420
AT5G25390
AT4G28500
AT1G13635
AT5G60440
AT1G27210
AT3G23410
AT1G24020
AT3G15050
AT5G54690
AT3G53010
AT2G47360
AT3G49400
AT5G15630
AT3G57070
AT5G11890
AT5G17420
AT1G06930
AT5G01650
AT3G05660
AT4G27950
AT5G46570
AT5G12890
AT4G39150
AT3G28345
AT1G08710
AT1G74920
AT1G32700
AT3G28470
AT5G32450
AT1G14130
AT2G04520
AT4G02670
AT3G14200
AT1G74110
AT4G21380
AT1G13680
AT5G25940
AT5G65280
AT5G64940
AT3G23240
AT2G23690
AT4G33440
AT5G05710
AT1G27090
AT1G24530
AT1G69780
AT3G11920
AT2G34070
AT5G24270
AT5G53020
AT1G73480
AT3G61250
AT1G56300
AT3G21710
AT3G16520
AT3G16520
AT5G51970
AT5G23850
AT1G58170
AT4G32880
AT5G64700
AT1G22710
AT3G05660
AT1G24530
AT4G23750
AT1G23220
AT1G06330
AT4G39330
AT1G09850
AT2G16050
AT3G50870
AT4G10465
AT5G06790
AT3G50870
AT5G47530
AT5G04890
AT2G18360
AT1G67790
AT1G79480
AT1G78380
AT3G06880
AT3G27030
AT5G14750
AT1G17860
AT5G64750
AT1G68320
AT1G02900
