# Supplementary material for: Ethylene-Related Gene Expression Networks in Wood Formation
Source: Front Plant Sci. 2018 Mar 14;9:272. doi: 10.3389/fpls.2018.00272 (PMC5861219; doi:10.3389/fpls.2018.00272)
Supplement: Supplementary Table S9 — Primers used in this study. [file Table9.xlsx]

## Sheet: Sheet1
Supplementary Table S9. Primers used in this study.
Primer name	Sequence 5’-3’	Purpose
EIN3D_F	CACCATGGGAATCTTTGAAGAAATG	Cloning of 35S:PtEIN3D vector
EIN3D_R	AGCAGGCTCTGTGTTGAGA
EIN3F_F	CACCATGGGTGAATTGGAAGAGATT	Cloning of 35S:PtEINF vector
EIN3F_R	CTGAAACTATGCACCAAAGCA
EIN3D_qF3	AACATGAATCCTGGGAGTGC	qRT-PCR for transgene expression (EIN3D)
EIN3D_qR3	GCTGTTGATTTTGACCACCA
EIN3F_qF	ATTTGCGCGGACCTTGAAGCTG	qRT-PCR for transgene expression (EIN3D)
EIN3F_qR	ACGATCCTTCCACATTCGCCTCTC
AtEF1A_F	TGGTGACGCTGGTATGGTT	qRT-PCR housekeeping gene
AtEF1A_R	TCCTTCTTGTCCACGCTCTT
